# Supplementary material for: Transcriptional Suppression, DNA Methylation, and Histone Deacetylation of the Regulator of G-Protein Signaling 10 (RGS10) Gene in Ovarian Cancer Cells
Source: PubMed Central journal article supplement (PMC3606337; doi:10.1371/journal.pone.0060185), 2013-03-22

### Primer region BS10-1

A2780

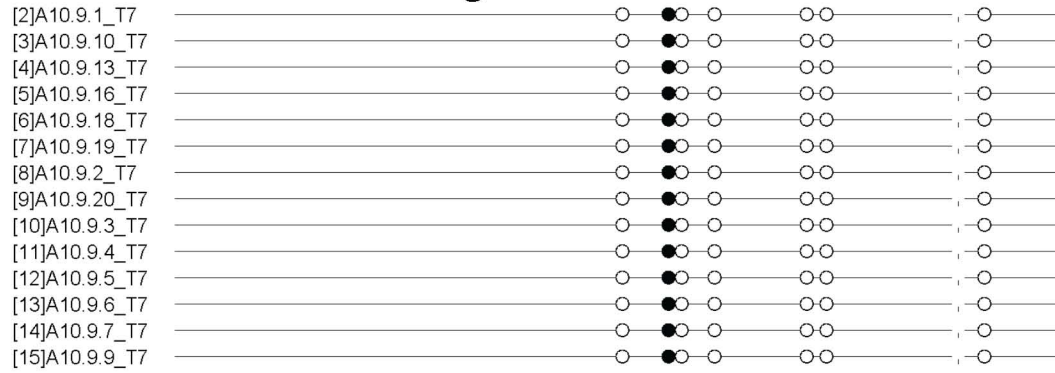

A2780-AD

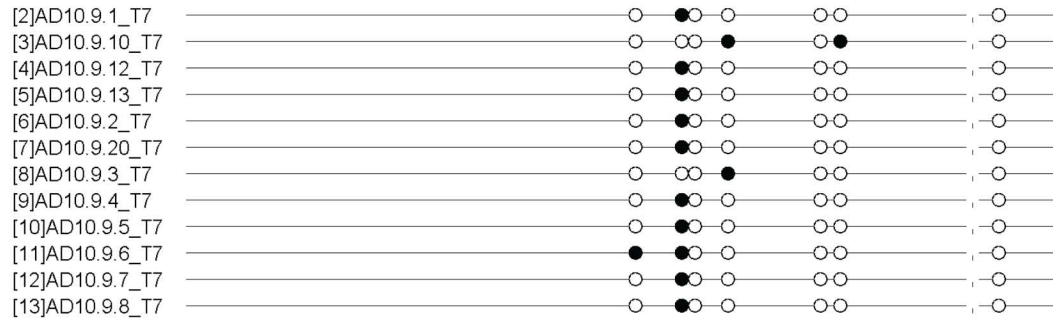

IOSE

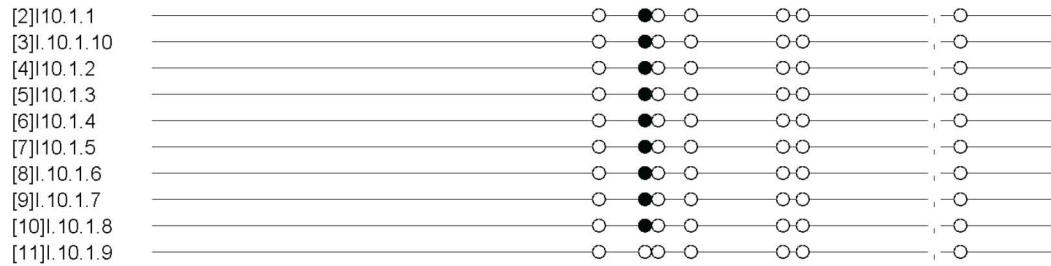

CAOV-3

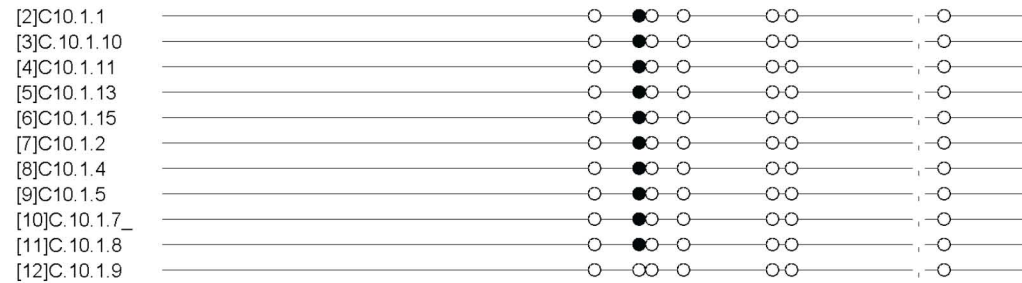

# Primer region BS10-2

A2780

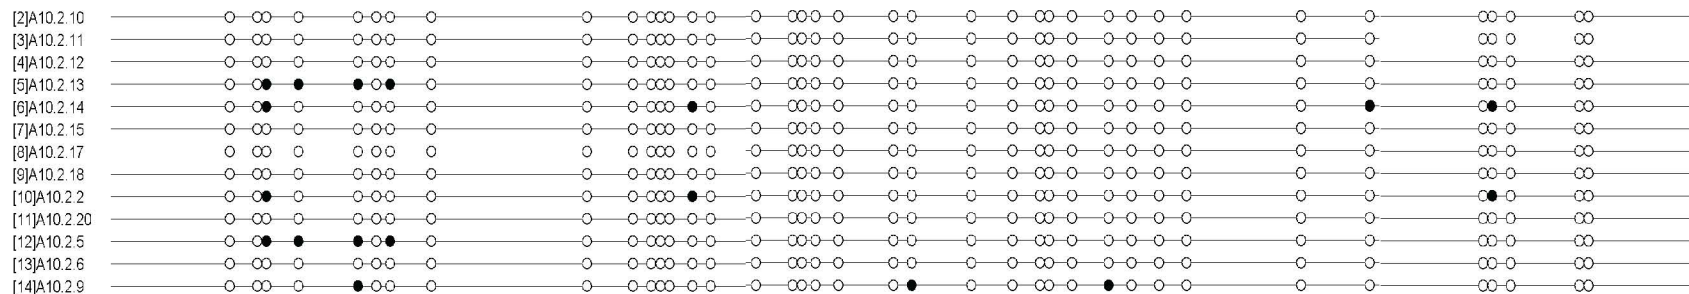

A2780-AD

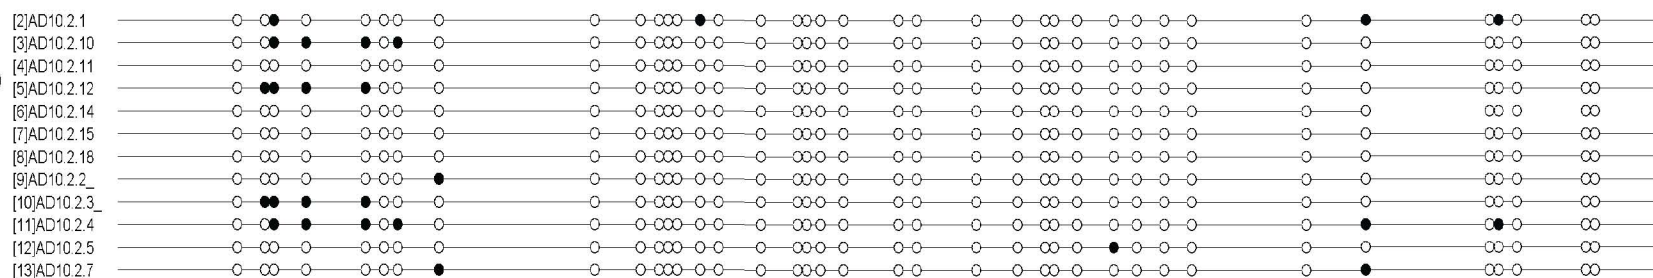

IOSE

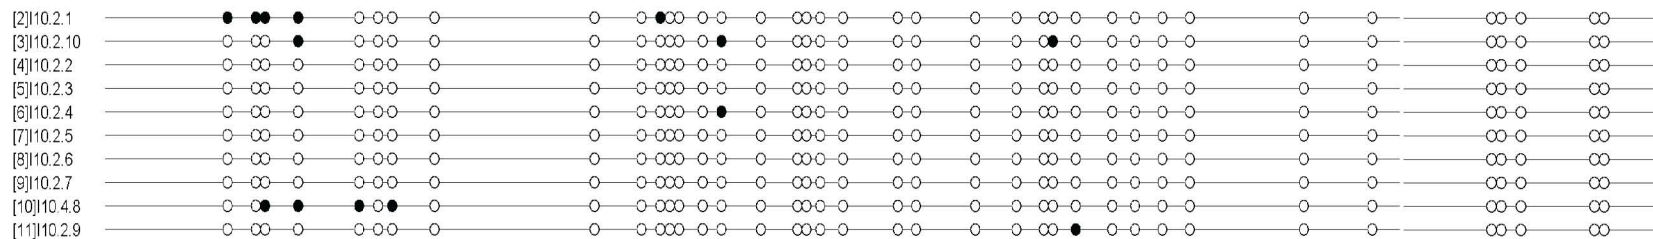

CAOV

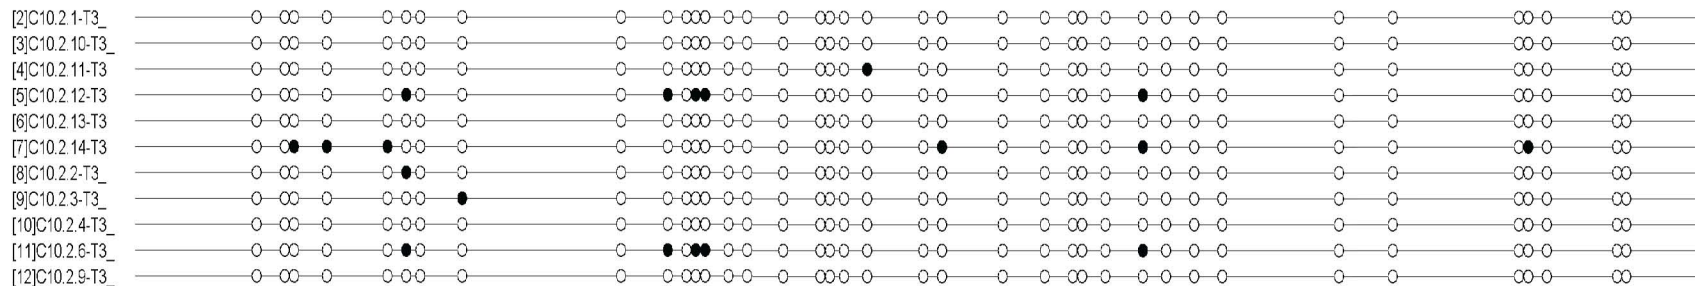

# Primer region BS10-3

A2780

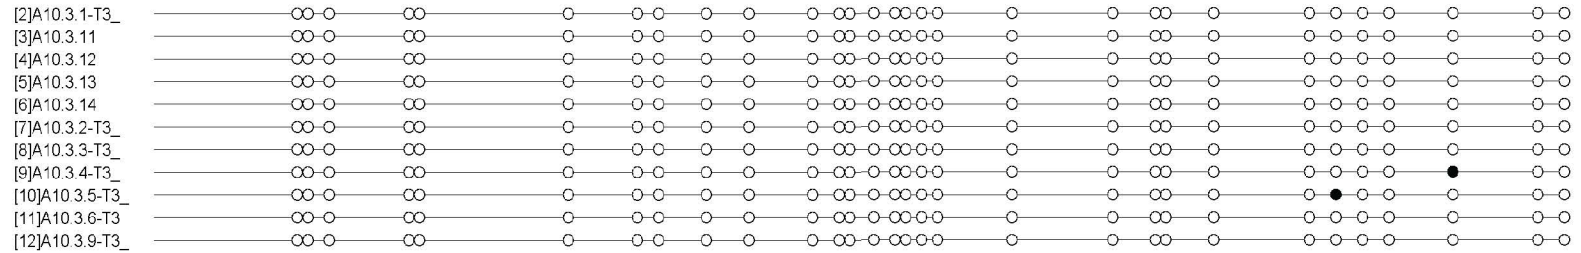

A2780-AD

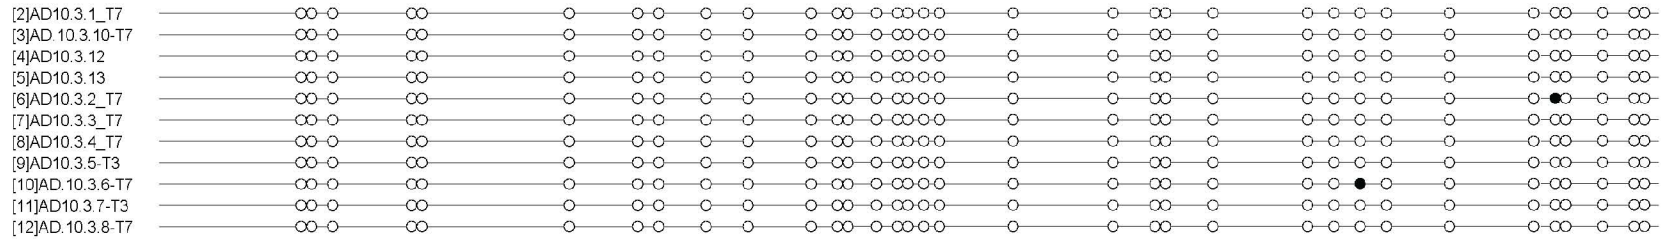

IOSE

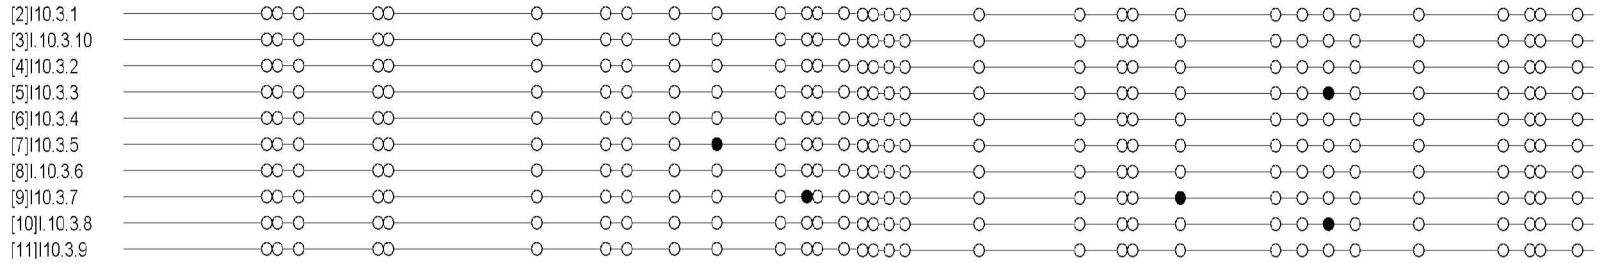

CAOV

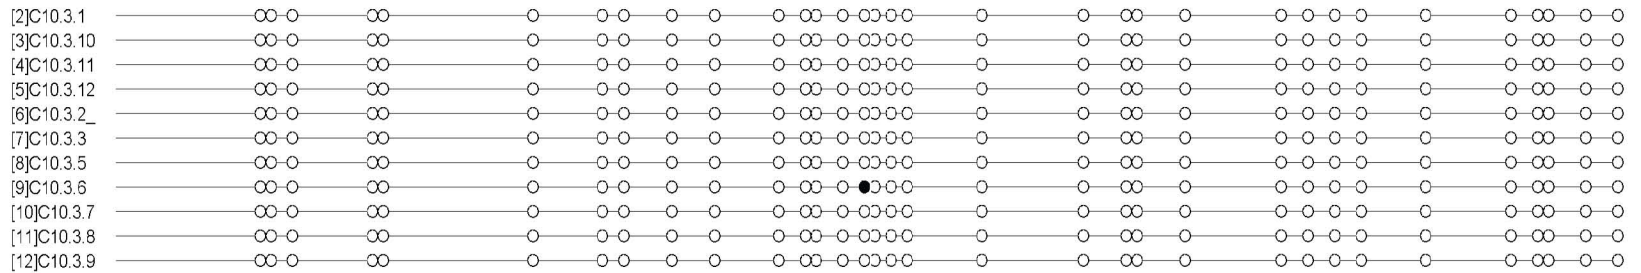

# Primer region BS10-4

A2780

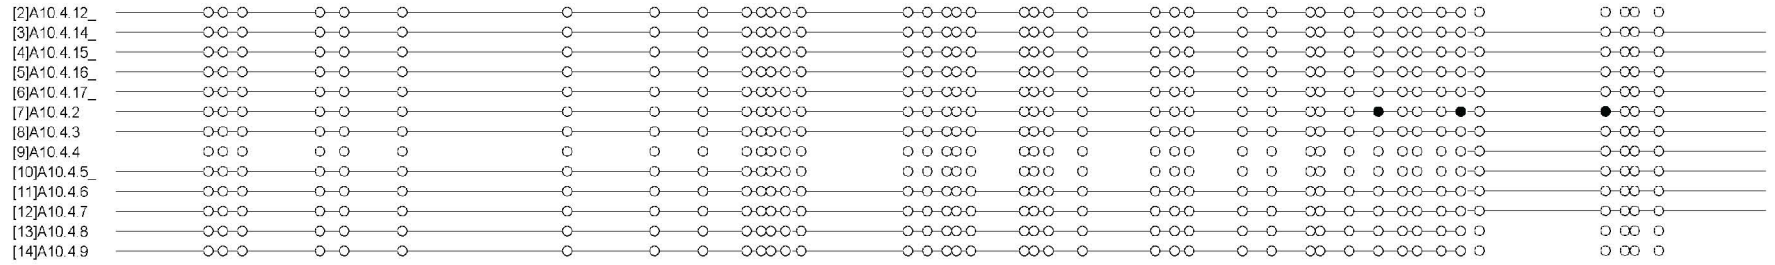

A2780-AD

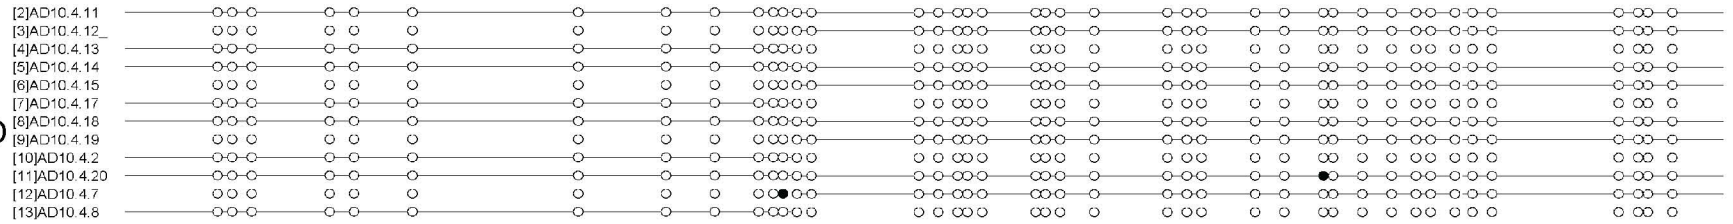

IOSE

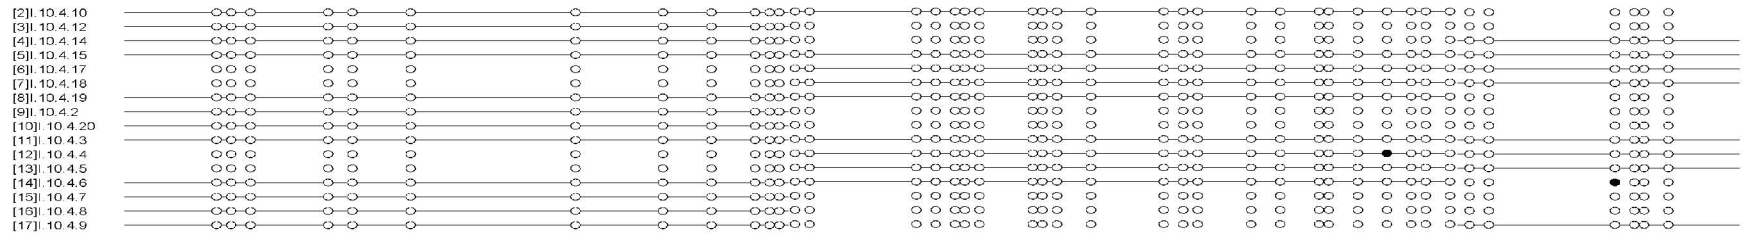

CAOV

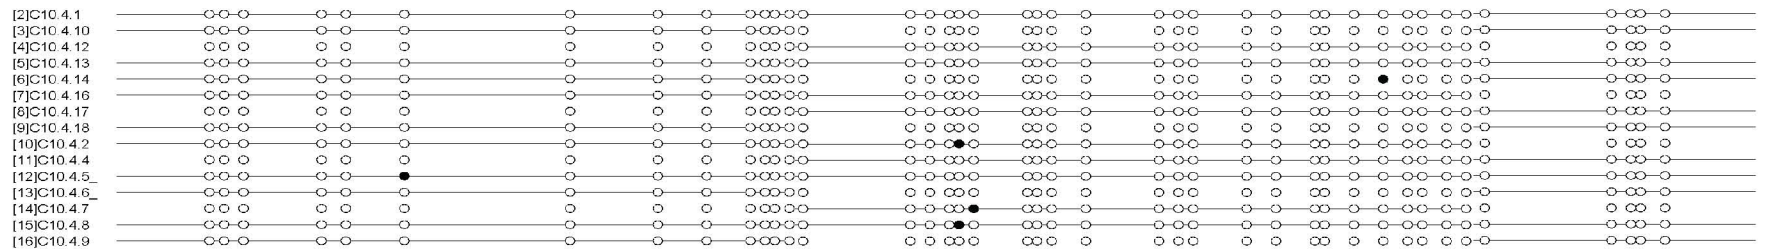

Supplement: pone.0060185.s001.pdf [file pone.0060185.s001.pdf]
